# Supplementary material
Source: Copernicus journal article supplement (doi:10.5194/gmd-19-2691-2026)
Supplement: Supplementary file 1 [file gmd-19-2691-2026-supplement.pdf]

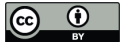

*Supplement of*

## **Machine learning-driven characterization and prescription of aerosol optical properties for atmospheric models**

**Nilton Évora do Rosário et al.**

*Correspondence to:* Nilton Évora do Rosário (nrosario@unifesp.br)

The copyright of individual parts of the supplement might differ from the article licence.

## Supplement

Table S1 - Mean, median and standard deviation of optical and microphysical properties of each cluster.

| Cluster     |        | 0      | 1      | 2      | 3      | 4      |
|-------------|--------|--------|--------|--------|--------|--------|
| vmr_f       | mean   | 0,1371 | 0,1434 | 0,1558 | 0,2045 | 0,1802 |
| vmr_f       | median | 0,1320 | 0,1380 | 0,1520 | 0,2035 | 0,1720 |
| vmr_f       | std    | 0,0247 | 0,0315 | 0,0208 | 0,0419 | 0,0369 |
| vmr_c       | mean   | 2,0184 | 1,8822 | 3,1005 | 2,8167 | 2,8173 |
| vmr_c       | median | 1,9950 | 1,8770 | 3,0310 | 2,7995 | 2,7740 |
| vmr_c       | std    | 0,2273 | 0,1700 | 0,4527 | 0,4189 | 0,5696 |
| reff_f      | mean   | 0,1161 | 0,1166 | 0,1431 | 0,1826 | 0,1653 |
| reff_f      | median | 0,1130 | 0,1120 | 0,1400 | 0,1810 | 0,1560 |
| reff_f      | std    | 0,0202 | 0,0244 | 0,0171 | 0,0345 | 0,0332 |
| reff_c      | mean   | 1,6814 | 1,6115 | 2,4348 | 2,3110 | 2,2478 |
| reff_c      | median | 1,6665 | 1,6130 | 2,3620 | 2,2790 | 2,1800 |
| reff_c      | std    | 0,1594 | 0,1319 | 0,4340 | 0,3781 | 0,4933 |
| std_f       | mean   | 0,6056 | 0,6737 | 0,4189 | 0,4687 | 0,4133 |
| std_f       | median | 0,6170 | 0,6810 | 0,4100 | 0,4640 | 0,4090 |
| std_f       | std    | 0,0893 | 0,0737 | 0,0612 | 0,0641 | 0,0506 |
| std_c       | mean   | 0,5960 | 0,5402 | 0,6772 | 0,6301 | 0,6666 |
| std_c       | median | 0,5960 | 0,5390 | 0,6870 | 0,6310 | 0,6740 |
| std_c       | std    | 0,0516 | 0,0430 | 0,0617 | 0,0496 | 0,0496 |
| ssa440      | mean   | 0,9095 | 0,9105 | 0,8594 | 0,9481 | 0,9365 |
| ssa440      | median | 0,9104 | 0,9102 | 0,8599 | 0,9523 | 0,9406 |
| ssa440      | std    | 0,0267 | 0,0210 | 0,0316 | 0,0286 | 0,0311 |
| ssa670      | mean   | 0,9722 | 0,9793 | 0,8418 | 0,9457 | 0,9386 |
| ssa670      | median | 0,9792 | 0,9831 | 0,8481 | 0,9481 | 0,9392 |
| ssa670      | std    | 0,0186 | 0,0117 | 0,0376 | 0,0290 | 0,0291 |
| ssa870      | mean   | 0,9733 | 0,9805 | 0,8072 | 0,9350 | 0,9281 |
| ssa870      | median | 0,9806 | 0,9857 | 0,8139 | 0,9389 | 0,9284 |
| ssa870      | std    | 0,0203 | 0,0132 | 0,0491 | 0,0363 | 0,0344 |
| ssa1020     | mean   | 0,9752 | 0,9829 | 0,7873 | 0,9301 | 0,9225 |
| ssa1020     | median | 0,9801 | 0,9900 | 0,8003 | 0,9360 | 0,9221 |
| ssa1020     | std    | 0,0197 | 0,0128 | 0,0568 | 0,0409 | 0,0374 |
| asy440      | mean   | 0,7550 | 0,7874 | 0,6732 | 0,7343 | 0,6896 |
| asy440      | median | 0,7564 | 0,7877 | 0,6695 | 0,7362 | 0,6899 |
| asy440      | std    | 0,0249 | 0,0189 | 0,0272 | 0,0253 | 0,0189 |
| asy670      | mean   | 0,7190 | 0,7516 | 0,5845 | 0,6761 | 0,6299 |
| asy670      | median | 0,7233 | 0,7517 | 0,5786 | 0,6851 | 0,6349 |
| asy670      | std    | 0,0210 | 0,0132 | 0,0443 | 0,0462 | 0,0358 |
| asy870      | mean   | 0,7215 | 0,7519 | 0,5473 | 0,6440 | 0,6006 |
| asy870      | median | 0,7260 | 0,7524 | 0,5368 | 0,6505 | 0,6024 |
| asy870      | std    | 0,0196 | 0,0124 | 0,0540 | 0,0523 | 0,0448 |
| asy1020     | mean   | 0,7263 | 0,7554 | 0,5387 | 0,6320 | 0,5912 |
| asy1020     | median | 0,7300 | 0,7554 | 0,5270 | 0,6359 | 0,5878 |
| asy1020     | std    | 0,0173 | 0,0123 | 0,0586 | 0,0546 | 0,0552 |
| rfi_real440 | mean   | 1,4715 | 1,4436 | 1,5087 | 1,4259 | 1,5244 |
| rfi_real440 | median | 1,4712 | 1,4458 | 1,5091 | 1,4322 | 1,5318 |
| rfi_real440 | std    | 0,0376 | 0,0274 | 0,0685 | 0,0546 | 0,0521 |
| rfi_real670 | mean   | 1,4919 | 1,4581 | 1,5157 | 1,4194 | 1,5174 |

|             |        |         |         |         |         |         |
|-------------|--------|---------|---------|---------|---------|---------|
| rfi_real670 | median | 1,4873  | 1,4589  | 1,5192  | 1,4218  | 1,5234  |
| rfi_real670 | std    | 0,0278  | 0,0184  | 0,0538  | 0,0316  | 0,0366  |
| rfi_real870 | mean   | 1,4877  | 1,4478  | 1,5180  | 1,4209  | 1,5144  |
| rfi_real870 | median | 1,4837  | 1,4483  | 1,5223  | 1,4213  | 1,5173  |
| rfi_real870 | std    | 0,0239  | 0,0160  | 0,0500  | 0,0278  | 0,0341  |
| rfi_real102 | mean   | 1,4804  | 1,4363  | 1,5144  | 1,4184  | 1,5070  |
| rfi_real102 | median | 1,4761  | 1,4367  | 1,5205  | 1,4181  | 1,5075  |
| rfi_real102 | std    | 0,0247  | 0,0169  | 0,0477  | 0,0277  | 0,0343  |
| rfi_imag44  | mean   | 0,0049  | 0,0043  | 0,0253  | 0,0060  | 0,0085  |
| rfi_imag44  | median | 0,0045  | 0,0041  | 0,0239  | 0,0054  | 0,0082  |
| rfi_imag44  | std    | 0,0021  | 0,0013  | 0,0086  | 0,0037  | 0,0043  |
| rfi_imag670 | mean   | 0,0015  | 0,0011  | 0,0215  | 0,0053  | 0,0066  |
| rfi_imag670 | median | 0,0010  | 0,0008  | 0,0197  | 0,0049  | 0,0062  |
| rfi_imag670 | std    | 0,0012  | 0,0007  | 0,0079  | 0,0032  | 0,0034  |
| rfi_imag87  | mean   | 0,0016  | 0,0012  | 0,0222  | 0,0056  | 0,0068  |
| rfi_imag87  | median | 0,0011  | 0,0008  | 0,0199  | 0,0051  | 0,0063  |
| rfi_imag87  | std    | 0,0014  | 0,0009  | 0,0092  | 0,0037  | 0,0035  |
| rfi_imag102 | mean   | 0,0017  | 0,0012  | 0,0222  | 0,0057  | 0,0068  |
| rfi_imag102 | median | 0,0013  | 0,0006  | 0,0196  | 0,0050  | 0,0063  |
| rfi_imag102 | std    | 0,0015  | 0,0010  | 0,0102  | 0,0039  | 0,0036  |
| LDR440      | mean   | 0,1732  | 0,2114  | 0,0131  | 0,0313  | 0,0344  |
| LDR440      | median | 0,1773  | 0,2094  | 0,0036  | 0,0038  | 0,0036  |
| LDR440      | std    | 0,0420  | 0,0362  | 0,0253  | 0,0427  | 0,0455  |
| LDR670      | mean   | 0,2214  | 0,2647  | 0,0186  | 0,0358  | 0,0380  |
| LDR670      | median | 0,2346  | 0,2705  | 0,0118  | 0,0115  | 0,0107  |
| LDR670      | std    | 0,0454  | 0,0303  | 0,0182  | 0,0387  | 0,0399  |
| LDR870      | mean   | 0,2426  | 0,2874  | 0,0194  | 0,0371  | 0,0401  |
| LDR870      | median | 0,2577  | 0,2937  | 0,0127  | 0,0120  | 0,0114  |
| LDR870      | std    | 0,0467  | 0,0300  | 0,0184  | 0,0410  | 0,0431  |
| LDR1020     | mean   | 0,2535  | 0,2993  | 0,0122  | 0,0317  | 0,0362  |
| LDR1020     | median | 0,2689  | 0,3038  | 0,0047  | 0,0044  | 0,0041  |
| LDR1020     | std    | 0,0474  | 0,0307  | 0,0210  | 0,0445  | 0,0482  |
| LR440       | mean   | 64,3056 | 70,2883 | 88,7544 | 77,1293 | 60,8497 |
| LR440       | median | 63,9365 | 69,5020 | 86,8230 | 75,7680 | 61,3060 |
| LR440       | std    | 9,0500  | 7,9190  | 16,3755 | 16,5475 | 14,7009 |
| LR670       | mean   | 43,1043 | 50,1851 | 54,1279 | 60,6682 | 47,8367 |
| LR670       | median | 43,1125 | 49,6430 | 50,9810 | 60,6010 | 45,9210 |
| LR670       | std    | 4,3556  | 4,3933  | 12,2167 | 12,2187 | 10,6693 |
| LR870       | mean   | 43,8387 | 52,6138 | 42,2470 | 51,4978 | 39,3875 |
| LR870       | median | 44,0395 | 52,1030 | 38,8990 | 50,7710 | 38,2370 |
| LR870       | std    | 4,3887  | 4,7388  | 11,3011 | 12,5723 | 10,4292 |
| LR1020      | mean   | 46,0858 | 56,3432 | 37,7698 | 47,0174 | 35,4478 |
| LR1020      | median | 46,1805 | 55,7800 | 34,3160 | 46,3820 | 34,7830 |
| LR1020      | std    | 4,9359  | 5,5016  | 10,6425 | 11,8851 | 9,2532  |

Table S2 - Mean volume particle size distribution as function of radius for each cluster.

| Radius( $\mu\text{m}$ ) | Clusters mean volume particle size distribution as function of radius ( $\mu\text{m}^3/\mu\text{m}^2$ )                                                                                                                                                                                     |  |
|-------------------------|---------------------------------------------------------------------------------------------------------------------------------------------------------------------------------------------------------------------------------------------------------------------------------------------|--|
| [0.05,                  | <b>Cluster 0</b> ([0.00746956, 0.01921329, 0.03028816, 0.02589049, 0.01613817, 0.01084328, 0.0100023 , 0.01328514, 0.02074599, 0.02914561, 0.03857136, 0.06109866, 0.11383102, 0.17465919, 0.1699613 , 0.12803852, 0.08359337, 0.0475923 , 0.02261995, 0.0087932 , 0.00289074, 0.00091922]) |  |
| 0.065604                |                                                                                                                                                                                                                                                                                             |  |
| 0.086077                |                                                                                                                                                                                                                                                                                             |  |
| 0.112939                |                                                                                                                                                                                                                                                                                             |  |
| 0.148184                |                                                                                                                                                                                                                                                                                             |  |
| 0.194429                |                                                                                                                                                                                                                                                                                             |  |
| 0.255105                | <b>Cluster 1</b> ([0.01246812, 0.02194062, 0.02617934, 0.01872784, 0.01098944, 0.00810001, 0.00956317, 0.01684171, 0.03133539, 0.04367875, 0.04915988, 0.06776062, 0.13481862, 0.26612858, 0.28392134, 0.17208717, 0.07599688, 0.03015943, 0.01177114, 0.00472025, 0.0020729 , 0.00112952]) |  |
| 0.334716                |                                                                                                                                                                                                                                                                                             |  |
| 0.439173                |                                                                                                                                                                                                                                                                                             |  |
| 0.576227                |                                                                                                                                                                                                                                                                                             |  |
| 0.756052                |                                                                                                                                                                                                                                                                                             |  |
| 0.991996                |                                                                                                                                                                                                                                                                                             |  |
| 1.301571                | <b>Cluster 2</b> ([0.00053764, 0.0060057 , 0.02952382, 0.06068518, 0.0691188 , 0.05030102, 0.02522124, 0.0117204 , 0.00697745, 0.00614911, 0.00750429, 0.01076075, 0.01521814, 0.01884122, 0.02239693, 0.02783376, 0.03364816, 0.03310523, 0.02281578, 0.01021044, 0.00288488, 0.00052916]) |  |
| 1.707757                |                                                                                                                                                                                                                                                                                             |  |
| 2.240702                |                                                                                                                                                                                                                                                                                             |  |
| 2.939966                |                                                                                                                                                                                                                                                                                             |  |
| 3.857452                |                                                                                                                                                                                                                                                                                             |  |
| 5.06126                 |                                                                                                                                                                                                                                                                                             |  |
| 6.640745                | <b>Cluster 3</b> ([0.00054038, 0.0035513 , 0.0161313 , 0.03539967, 0.04535381, 0.04615952, 0.04072243, 0.02634627, 0.01467314, 0.0099306, 0.00974848, 0.01311973, 0.01957372, 0.02657935, 0.03080725, 0.03367282, 0.03391425, 0.02744734, 0.01601158, 0.00667934, 0.00204447, 0.00047592])  |  |
| 8.713145                |                                                                                                                                                                                                                                                                                             |  |
| 11.4323                 |                                                                                                                                                                                                                                                                                             |  |
| 15.0]                   |                                                                                                                                                                                                                                                                                             |  |
|                         |                                                                                                                                                                                                                                                                                             |  |
|                         | <b>Cluster 4</b> ([0.00057772, 0.00390664, 0.01567725, 0.03059 , 0.03936049, 0.04083636, 0.03145199, 0.01545702, 0.00783089, 0.00688574, 0.00928641, 0.01456289, 0.02156659, 0.02550996, 0.02730787, 0.03069614, 0.03361232, 0.02923737, 0.01757699, 0.00721282, 0.0021053 , 0.00047402])   |  |
|                         |                                                                                                                                                                                                                                                                                             |  |
|                         |                                                                                                                                                                                                                                                                                             |  |
|                         |                                                                                                                                                                                                                                                                                             |  |
|                         |                                                                                                                                                                                                                                                                                             |  |

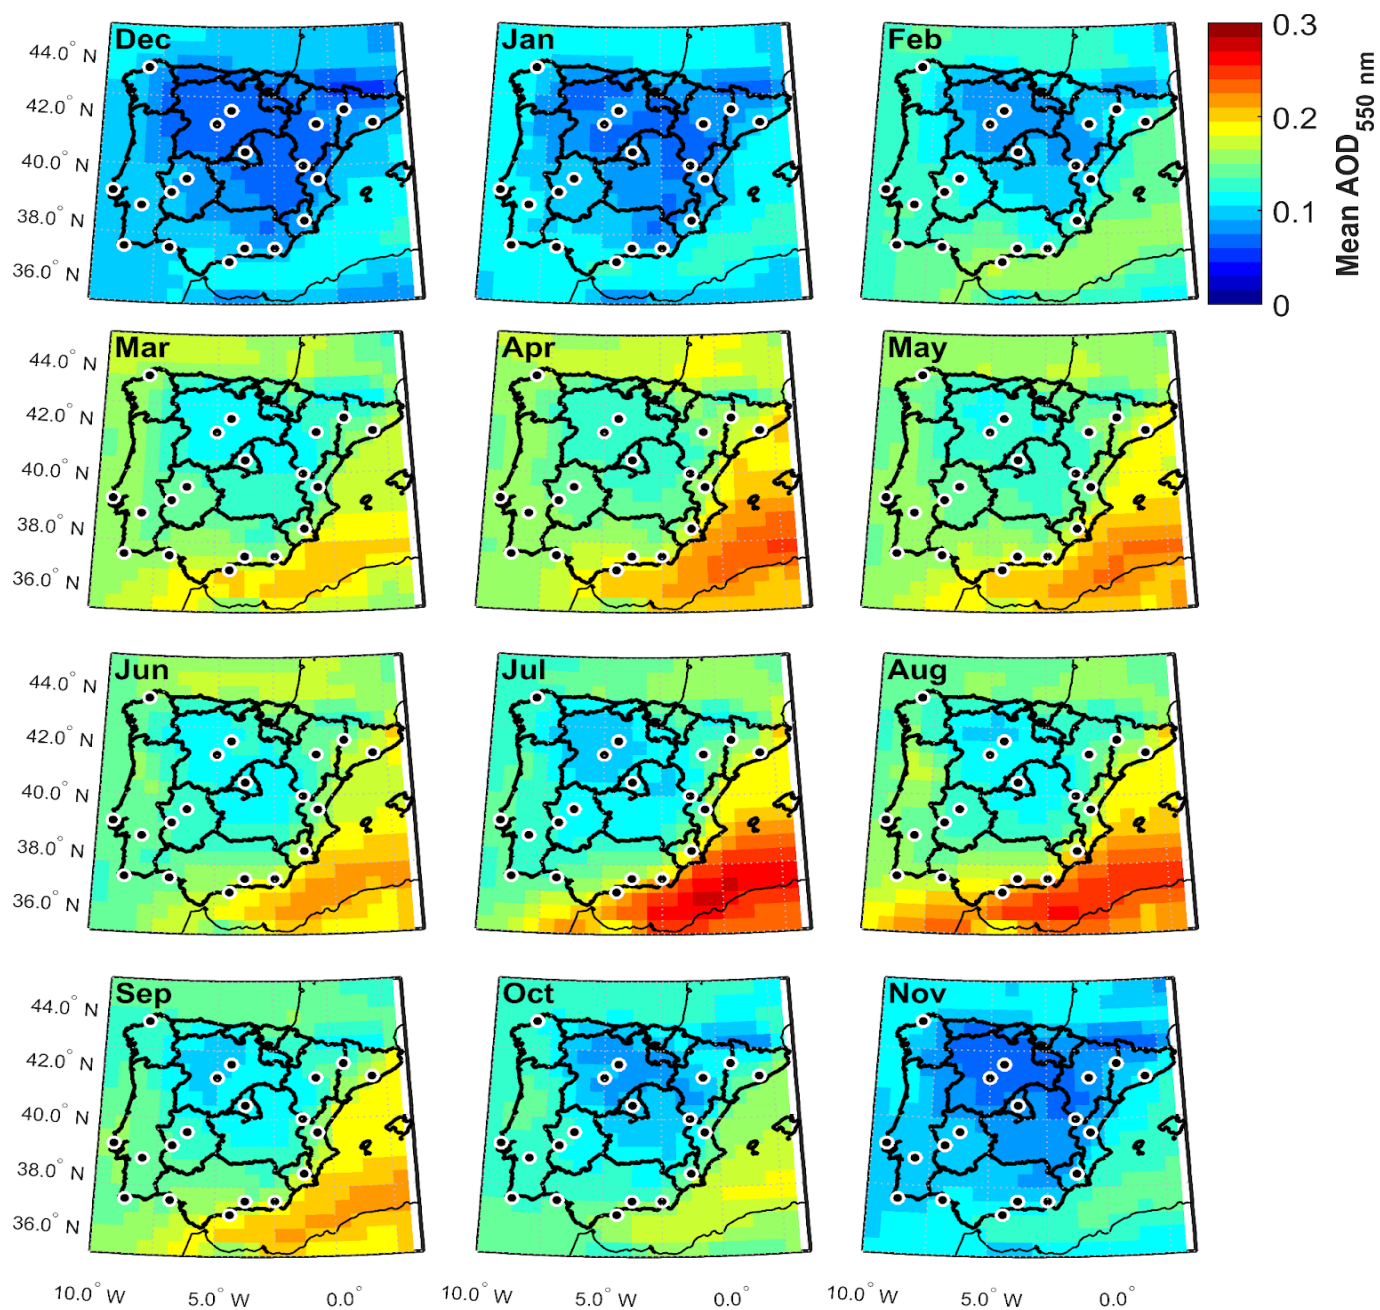

Figure S1 - Monthly climatology of Aerosol Optical Depth at 550 nm over the Iberian Peninsula from MERRA-2 aerosol products to provide a perspective on the spatial and monthly dynamic of aerosol loading in the region.

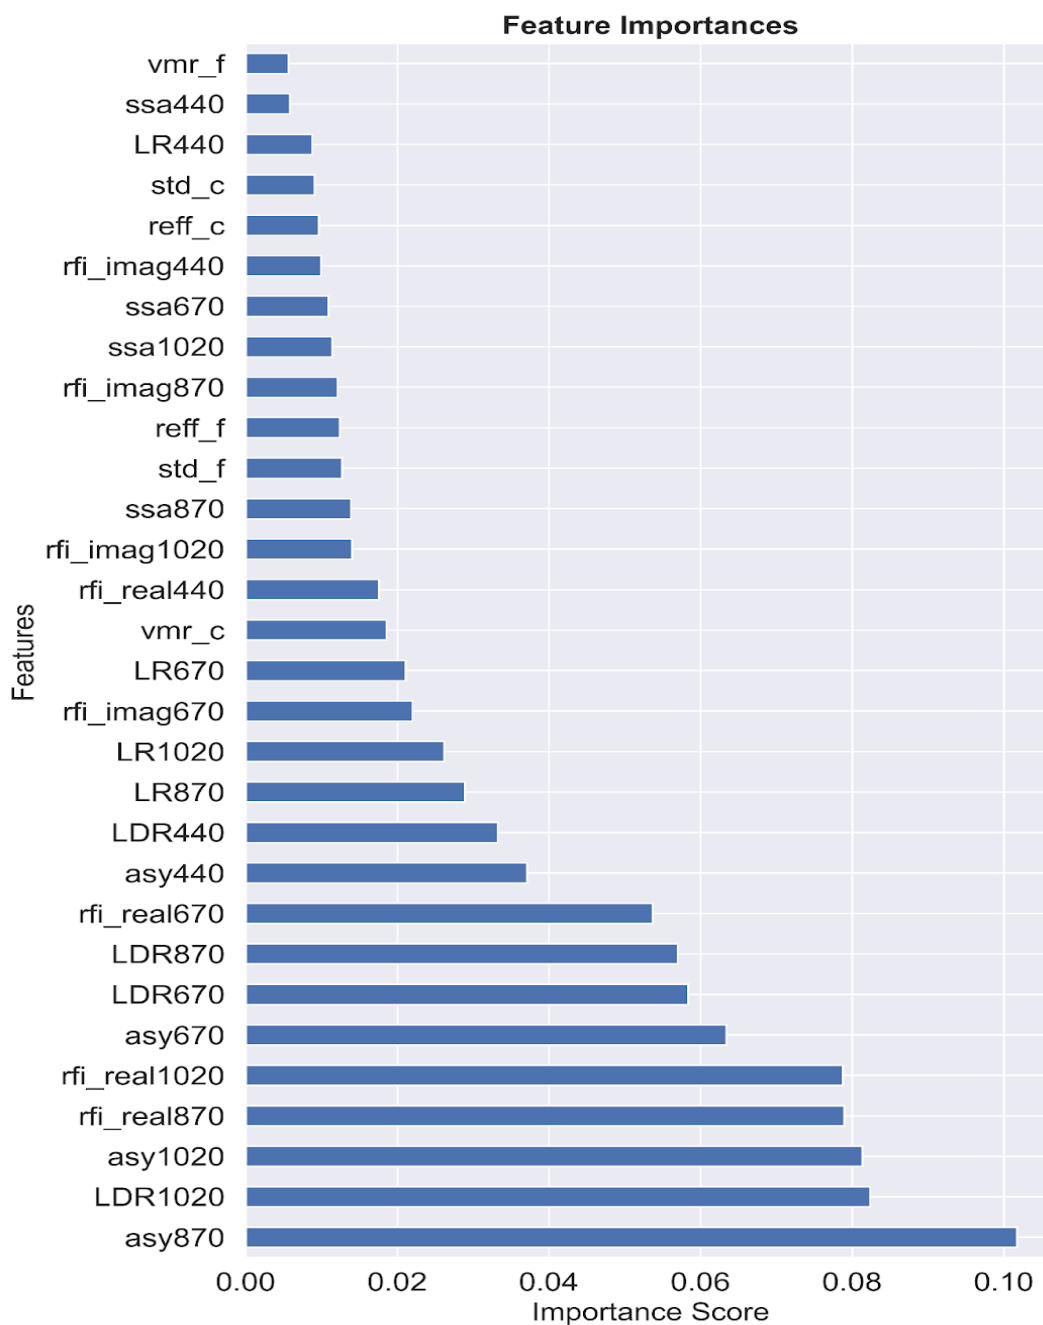

**Figure S2 - The relative importance of predictors from Table 1 (in the manuscript) in cluster prediction. It is possible to observe consistency between this score scale and the importance score scale regarding aerosol types (Figure 10). In Figure 10, the dust (dst) mass variability emerges as the most relevant factor for determining which cluster should be applied. In the figure below, which shows the importance of the optical parameters from Table 1 for clustering, the scores are well distributed (maximum close to 0.1). However, it became clear that higher wavelengths (near infrared 870 and 1020 nm) and optical parameters (ASYmmetry parameter and Linear Depolarization Ratio), that best differentiate dust from other aerosol types, presented the highest importances**

The following tables present a summary of the results obtained for the cluster robustness analysis.

**Table S3 - Results for jitter and bootstrap robustness tests. The jitter robustness test was conducted by adding Gaussian noises testing different uncertainty possibilities (5%, 10%, 20%) to the standardized feature matrix.**

| Random Perturbation | Jitter Robustness<br>(5% / 10% / 20%) | Bootstrap |
|---------------------|---------------------------------------|-----------|
| Mean ARI            | 0.8570 / 0.8511 / 0.8183              | 0.8405    |
| Std ARI             | 0.2039 / 0.1887 / 0.1698              | 0.1925    |
| Min ARI             | 0.4823 / 0.4821 / 0.4801              | 0.4646    |
| Max ARI             | 0.9813 / 0.9650 / 0.9215              | 0.9837    |

**Table S4 - Results for the cluster retention score metric. The test was also conducted for three scenarios by adding Gaussian noises testing different uncertainty possibilities (5%, 10%, 20%) to the standardized feature matrix.**

| Cluster-wise Stability | 5%     | 10%    | 20%    |
|------------------------|--------|--------|--------|
| Cluster 0              | 0.9692 | 0.9638 | 0.9456 |
| Cluster 1              | 0.9916 | 0.9844 | 0.9721 |
| Cluster 2              | 0.9905 | 0.9907 | 0.9851 |
| Cluster 3              | 0.8890 | 0.8922 | 0.8830 |
| Cluster 4              | 0.9292 | 0.9377 | 0.9339 |

**Table S5 - Results for the consensus (co-assignment) matrix metric. The test was also conducted for three scenarios by adding Gaussian noises testing different uncertainty possibilities (5%, 10%, 20%) to the standardized feature matrix.**

| Co-assignment matrix           | 5%     | 10%    | 20%    |
|--------------------------------|--------|--------|--------|
| Mean Intra-cluster probability | 0.9302 | 0.9276 | 0.9087 |
| Mean Inter-cluster probability | 0.0512 | 0.0500 | 0.0561 |
